# Supplementary material for: PIK3CA mutations are associated with increased tumor aggressiveness and Akt activation in gastric cancer
Source: PubMed Central journal article supplement (PMC5710896; doi:10.18632/oncotarget.18770), 2017-06-28
Supplement: oncotarget-08-90948-s001.pdf [file oncotarget-08-90948-s001.pdf]

## ***PIK3CA* mutations are associated with increased tumor aggressiveness and Akt activation in gastric cancer**

### Supplementary Materials

**Supplementary Table 1: Frequency of *PIK3CA* mutations in patients in cohorts 1 and 2**

| <b><i>PIK3CA</i> mutations</b> | <b>Cohort 1 (%)<sup>*</sup></b> | <b>Cohort 2 (%)<sup>†</sup></b> |
|--------------------------------|---------------------------------|---------------------------------|
| E545X (A, D, G, or K)          | 22 (7.3)                        | 6 (5.0)                         |
| E542K                          | 10 (3.3)                        | 1 (0.8)                         |
| H1047X (L, R or Y)             | 7 (2.3)                         | 5 (4.2)                         |
| Q546X (K, R, E, or L)          | 2 (0.7)                         | 2 (1.7)                         |
| N345K                          | 2 (0.7)                         | 0 (0)                           |
| R88Q                           | 1 (0.3)                         | 2 (1.7)                         |
| C420R                          | 1 (0.3)                         | 0 (0)                           |

<sup>\*</sup>Five patients had two mutations simultaneously: E542K and E545X ( $n = 1$ ), E542K and H1047X ( $n = 1$ ), E545X and C420R ( $n = 1$ ), H1047X and R88Q ( $n = 1$ ), and N345K and E545X ( $n = 1$ ).

<sup>†</sup>One patient had H1047X and Q546X mutations simultaneously.

**Supplementary Table 2: Clinicopathological characteristics of patients with stage IB–III gastric cancer in cohort 1 according to their *PIK3CA* mutation status**

| Characteristics                                  | <i>PIK3CA</i> wild-type<br>( <i>n</i> = 236) (%) | <i>PIK3CA</i> mutant<br>( <i>n</i> = 37) (%) | <i>p</i> -value |
|--------------------------------------------------|--------------------------------------------------|----------------------------------------------|-----------------|
| Sex                                              |                                                  |                                              |                 |
| Male                                             | 157 (67)                                         | 27 (73)                                      | 0.437           |
| Female                                           | 79 (33)                                          | 10 (27)                                      |                 |
| Age                                              |                                                  |                                              |                 |
| < 70 years                                       | 191 (81)                                         | 28 (76)                                      | 0.455           |
| ≥ 70 years                                       | 45 (19)                                          | 9 (24)                                       |                 |
| Pathology                                        |                                                  |                                              |                 |
| Well or moderately differentiated adenocarcinoma | 94 (40)                                          | 8 (22)                                       | 0.029           |
| Poorly differentiated adenocarcinoma             | 104 (44)                                         | 26 (70)                                      |                 |
| Signet ring cell carcinoma                       | 27 (11)                                          | 2 (5)                                        |                 |
| Mucinous carcinoma                               | 11 (5)                                           | 1 (3)                                        |                 |
| Lauren classification                            |                                                  |                                              |                 |
| Intestinal type                                  | 89 (38)                                          | 6 (16)                                       | 0.001           |
| Diffuse type                                     | 124 (53)                                         | 21 (57)                                      |                 |
| Mixed type                                       | 23 (10)                                          | 10 (27)                                      |                 |
| Primary tumor location*                          |                                                  |                                              |                 |
| Lower third                                      | 126 (55)                                         | 16 (44)                                      | 0.033           |
| Middle third                                     | 63 (28)                                          | 7 (19)                                       |                 |
| Upper third                                      | 40 (17)                                          | 13 (36)                                      |                 |
| T stage                                          |                                                  |                                              |                 |
| pT1/T2                                           | 91 (39)                                          | 6 (16)                                       | 0.009           |
| pT3                                              | 81 (34)                                          | 13 (35)                                      |                 |
| pT4                                              | 64 (27)                                          | 18 (49)                                      |                 |
| N stage                                          |                                                  |                                              |                 |
| pN0                                              | 51 (22)                                          | 9 (24)                                       | 0.788           |
| pN1/N2                                           | 110 (47)                                         | 15 (41)                                      |                 |
| pN3                                              | 75 (32)                                          | 13 (35)                                      |                 |
| Stage (by AJCC 7th edition)                      |                                                  |                                              |                 |
| I                                                | 51 (22)                                          | 5 (14)                                       | 0.072           |
| II                                               | 72 (31)                                          | 8 (22)                                       |                 |
| III                                              | 113 (48)                                         | 24 (65)                                      |                 |
| Lymphatic invasion                               |                                                  |                                              |                 |
| Absent                                           | 62 (26)                                          | 3 (8)                                        | 0.016           |
| Present                                          | 174 (74)                                         | 34 (92)                                      |                 |
| Vascular invasion                                |                                                  |                                              |                 |
| Absent                                           | 207 (88)                                         | 25 (68)                                      | 0.001           |
| Present                                          | 29 (12)                                          | 12 (32)                                      |                 |
| Neural invasion                                  |                                                  |                                              |                 |
| Absent                                           | 117 (50)                                         | 11 (30)                                      | 0.024           |
| Present                                          | 119 (50)                                         | 26 (70)                                      |                 |
| Stroma reaction                                  |                                                  |                                              |                 |
| Absent                                           | 113 (48)                                         | 10 (27)                                      | < 0.001         |
| Desmoplasia                                      | 77 (33)                                          | 7 (19)                                       |                 |
| Lymphoid or neutrophil                           | 46 (19)                                          | 20 (54)                                      |                 |
| EBER <i>in situ</i> hybridization                |                                                  |                                              |                 |
| Negative                                         | 220 (93)                                         | 21 (57)                                      | < 0.001         |
| Positive                                         | 16 (7)                                           | 16 (43)                                      |                 |
| MSI                                              |                                                  |                                              |                 |
| MSS                                              | 218 (92)                                         | 30 (81)                                      | 0.058           |
| MSI-H                                            | 18 (8)                                           | 7 (19)                                       |                 |
| Gastrectomy                                      |                                                  |                                              |                 |
| Subtotal gastrectomy                             | 179 (76)                                         | 20 (54)                                      | 0.006           |
| Total gastrectomy                                | 57 (24)                                          | 17 (46)                                      |                 |
| Akt expression (cytoplasmic intensity)           |                                                  |                                              |                 |
| Negative                                         | 43 (20)                                          | 3 (9)                                        | 0.002           |
| 1+                                               | 115 (55)                                         | 16 (48)                                      |                 |
| 2+                                               | 47 (22)                                          | 8 (24)                                       |                 |
| 3+                                               | 5 (2)                                            | 6 (18)                                       |                 |

Abbreviations: AJCC = American Joint Committee on Cancer; EBER = Epstein-Barr virus-encoded small RNA.

\*Patients whose disease involved the entire stomach (*n* = 8) were excluded.

**Supplementary Table 3: Association between *PIK3CA* mutations and primary tumor location according to Lauren classification in patients in cohort 1**

(A) Intestinal type (*n* = 99)

| <b>Primary tumor location*</b> | <b><i>PIK3CA</i> wild-type<br/>(<i>n</i> = 93) (%)</b> | <b><i>PIK3CA</i> mutant<br/>(<i>n</i> = 6) (%)</b> | <b><i>p</i>-value</b> |
|--------------------------------|--------------------------------------------------------|----------------------------------------------------|-----------------------|
| Lower third                    | 55 (59.1)                                              | 4 (66.7)                                           | 1.000                 |
| Middle third                   | 23 (24.7)                                              | 1 (16.7)                                           |                       |
| Upper third                    | 15 (16.1)                                              | 1 (16.7)                                           |                       |

(B) Diffuse type (*n* = 153)

| <b>Primary tumor location*</b> | <b><i>PIK3CA</i> wild-type<br/>(<i>n</i> = 132) (%)</b> | <b><i>PIK3CA</i> mutant<br/>(<i>n</i> = 21) (%)</b> | <b><i>p</i>-value</b> |
|--------------------------------|---------------------------------------------------------|-----------------------------------------------------|-----------------------|
| Lower third                    | 62 (47.0)                                               | 9 (42.9)                                            | 0.227 <sup>†</sup>    |
| Middle third                   | 42 (31.8)                                               | 4 (19.0)                                            |                       |
| Upper third                    | 28 (21.2)                                               | 8 (38.1)                                            |                       |

\*Patients whose primary tumor involved the entire stomach were excluded.

<sup>†</sup>When primary tumor location was categorized into two groups (upper vs. middle/lower), the *p*-value was 0.090 by chi-square test.
